# Supplementary material
Source: PubMed Central journal article supplement (PMC3369268)
Supplement: NIHMS375362-supplement-01.pdf [file NIHMS375362-supplement-01.pdf]

**NIGHTTIME BLOOD PRESSURE DIPPING IN YOUNG ADULTS AND CORONARY  
ARTERY CALCIUM 10-15 YEARS LATER: THE CARDIA STUDY**

Short title: Nighttime BP and coronary artery calcium

ON-LINE SUPPLEMENT

Anthony J. Viera<sup>1</sup>, Feng-Chang Lin<sup>2</sup>, Alan L. Hinderliter<sup>3</sup>, Daichi Shimbo<sup>4</sup>, Sharina D. Person<sup>5</sup>,  
Mark J. Pletcher<sup>6</sup>, David R. Jacobs, Jr.<sup>7</sup>

<sup>1</sup> Department of Family Medicine, University of North Carolina at Chapel Hill

<sup>2</sup> Department of Biostatistics, University of North Carolina at Chapel Hill

<sup>3</sup> Department of Medicine, Division of Cardiology, University of North Carolina at Chapel Hill

<sup>4</sup> Department of Medicine, Columbia University Medical Center, New York, NY

<sup>5</sup> Department of Quantitative Health Sciences, Division of Biostatistics and Health Services  
Research, University of Massachusetts

<sup>6</sup> Department of Epidemiology & Biostatistics, University of California San Francisco

<sup>7</sup> Division of Epidemiology and Community Health, School of Public Health, University of  
Minnesota

Corresponding Author:

Anthony J. Viera, MD, MPH

Associate Professor

Department of Family Medicine

University of North Carolina at Chapel Hill

590 Manning Drive, CB 7595

Chapel Hill, NC 27599

Phone (919) 966-0758

Fax (919) 966-6125

e-mail: [anthony\\_viera@med.unc.edu](mailto:anthony_viera@med.unc.edu)

## Methods Supplement

### *Measurement of Covariates*

Education was determined by self-report of highest grade level achieved. Body mass index (BMI) was calculated based on measured height and weight at the baseline visit. Diabetes mellitus was defined as a fasting glucose level  $\geq 126$  mg/dl or use of hypoglycemic agents at baseline (CARDIA year 5). Family history of hypertension and family history of diabetes were determined by self-report. Current smoking, defined as regular cigarette smoking (at least five cigarettes a week almost every week for at least three months) was assessed by self-report. Additionally, serum cotinine, a biochemical marker of nicotine uptake, was measured at year 0.

High density lipoprotein (HDL) and low density lipoprotein (LDL) cholesterol levels were measured in a fasting serum sample at year 5. Physical activity was assessed by the CARDIA physical activity questionnaire, which measured the self-reported frequency of participation in 13 different categories of recreational sports and exercise in the past 12 months.<sup>1</sup> Physical activity scores were computed by multiplying the frequency of participation by the intensity of activity and reported as “exercise units.”

<sup>1</sup> Jacobs DR, Hahn L, Haskell WL, Pirie P, Sidney S. Validity and reliability of short physical activity history: CARDIA Study and the Minnesota Heart Health Program. *J Cardiopulm Rehabil.* 1989;9:448-459.

**Table S1. Participant Characteristics and their Association with Coronary Artery Calcification at Year 20 or Year 15**

| Characteristic                              | Year 20 (n=213)  |                 |         | Year 15 (n=26)   |                 |         |
|---------------------------------------------|------------------|-----------------|---------|------------------|-----------------|---------|
|                                             | CAC              | No CAC          | p-value | CAC              | No CAC          | p-value |
| Age, mean (SD), y                           | 31.9<br>(3.0)    | 30.0<br>(3.6)   | <0.001  | 32.8<br>(2.6)    | 29.7<br>(3.6)   | 0.08    |
| Male, %                                     | 59.2             | 39.0            | 0.01    | 100.0            | 52.4            | 0.05    |
| Black, %                                    | 55.1             | 64.0            | 0.26    | 60.0             | 71.4            | 0.62    |
| Education, mean (SD) years                  | 13.3<br>(2.0)    | 13.7<br>(1.8)   | 0.15    | 14.2<br>(3.2)    | 13.3<br>(2.2)   | 0.45    |
| BMI, mean (SD) kg/ m <sup>2</sup>           | 27.9<br>(4.9)    | 26.3<br>(5.3)   | 0.07    | 25.2<br>(3.6)    | 26.1<br>(4.8)   | 0.71    |
| Baseline smoker, %                          | 53.1             | 18.3            | <0.001  | 40.0             | 19.1            | 0.32    |
| Serum cotinine level (ng/ml), mean (SD)     | 125.7<br>(153.7) | 41.2<br>(107.5) | <0.001  | 198.4<br>(281.0) | 55.7<br>(113.1) | 0.32    |
| High density lipoprotein (mg/dl), mean (SD) | 49.0<br>(15.6)   | 51.2<br>(13.0)  | 0.32    | 39.6<br>(6.7)    | 53.0<br>(14.1)  | 0.05    |
| Low density lipoprotein (mg/dl), mean (SD)  | 122.4<br>(31.3)  | 107.4<br>(28.1) | 0.002   | 128.8<br>(31.3)  | 110.1<br>(24.3) | 0.15    |
| Known diabetes mellitus, %                  | 6.1              | 0.6             | 0.01    | 20.0             | 0.0             | 0.04    |
| Known hypertension, %                       | 4.1              | 6.7             | 0.50    | 0.0              | 9.5             | 0.47    |
| Glucose level (mg/dl) at year 7, mean (SD)  | 101.1<br>(41.7)  | 87.4<br>(9.0)   | 0.03    | 168.8<br>(180.3) | 89.3<br>(6.8)   | 0.38    |
| Baseline clinic SBP (mm Hg), mean (SD)      | 109.7<br>(10.0)  | 108.7<br>(10.0) | 0.54    | 108.0<br>(6.7)   | 105.5<br>(11.3) | 0.64    |
| Baseline clinic DBP (mm Hg), mean (SD)      | 73.3<br>(9.2)    | 73.1<br>(9.6)   | 0.90    | 71.2<br>(5.9)    | 72.9<br>(9.3)   | 0.71    |
| Clinic pulse pressure (mm Hg), mean (SD)    | 36.4<br>(8.1)    | 35.6<br>(7.7)   | 0.52    | 36.8<br>(7.5)    | 32.6<br>(7.6)   | 0.28    |

|                                            |               |               |       |               |               |      |
|--------------------------------------------|---------------|---------------|-------|---------------|---------------|------|
| Pack-years of tobacco at year 5, mean (SD) | 5.2 (7.0)     | 1.6 (4.1)     | 0.001 | 5.7 (7.8)     | 2.7 (5.2)     | 0.30 |
| Alcohol intake (ML/day), mean (SD)         | 23.7 (30.0)   | 8.0 (15.1)    | 0.001 | 7.4 (14.0)    | 5.7 (11.0)    | 0.78 |
| Physical activity (Kcal/d), mean (SD)      | 308.9 (274.9) | 350.3 (283.8) | 0.36  | 258.2 (156.8) | 323.9 (222.8) | 0.49 |
| Family history of hypertension, %          | 69.4          | 60.4          | 0.26  | 20.0          | 42.9          | 0.35 |
| Family history of diabetes, %              | 20.4          | 12.2          | 0.15  | 20.0          | 14.3          | 0.75 |
| Poor sleep quality, %                      | 10.2          | 20.1          | 0.11  | 20.0          | 9.5           | 0.51 |
| Dipping quartile* at baseline, %           |               |               |       |               |               |      |
| Q1                                         | 36.7          | 22.6          | 0.004 | 60.0          | 9.5           | 0.07 |
| Q2                                         | 16.3          | 29.3          |       | 20.0          | 28.6          |      |
| Q3                                         | 12.2          | 28.7          |       | 0.0           | 28.6          |      |
| Q4                                         | 34.7          | 19.5          |       | 20.0          | 33.3          |      |

---

\*Quartiles of mean nocturnal systolic BP/mean daytime systolic BP ratio: **Q1**: 0.7197-0.8454 (n=70); **Q2**: 0.8455-0.8809 (n=71); **Q3**: 0.8810-0.9203 (n=70); **Q4**: 0.9204-1.2358 (n=70)

SBP, systolic blood pressure; DBP, diastolic blood pressure; ABPM, ambulatory blood pressure monitoring

**Table S2. Characteristics of Participants at Time of CAC\* Measurement by Dipping Ratio Quartiles (N=281)**

| Characteristic                                             | Total           | Q1:<br>0.72-<br>0.85 | Q2:<br>0.85 -<br>0.88 | Q3:<br>0.88-<br>0.92 | Q4:<br>0.92-<br>1.24 | p-<br>value |
|------------------------------------------------------------|-----------------|----------------------|-----------------------|----------------------|----------------------|-------------|
| Age, mean (SD) years                                       | 45.0<br>(3.9)   | 45.8<br>(3.9)        | 44.2<br>(4.0)         | 44.8<br>(4.2)        | 45.2<br>(3.5)        | 0.17        |
| BMI, mean (SD) kg/ m <sup>2</sup>                          | 30.3<br>(7.0)   | 29.2<br>(7.2)        | 30.5<br>(6.9)         | 30.4<br>(6.9)        | 31.2<br>(6.9)        | 0.47        |
| Current smoker, %                                          | 17.8            | 15.7                 | 15.5                  | 10.0                 | 30.0                 | 0.01        |
| Smoking cessation rate, %                                  | 12.5            | 17.1                 | 9.9                   | 10.0                 | 12.9                 | 0.52        |
| Pack-years of tobacco, mean<br>(SD)                        | 4.5<br>(9.5)    | 5.9<br>(11.8)        | 4.1<br>(10.9)         | 2.9<br>(5.8)         | 5.0<br>(8.3)         | 0.28        |
| High density lipoprotein<br>cholesterol (mg/dl), mean (SD) | 52.3<br>(16.6)  | 52.7<br>(20.3)       | 54.0<br>(16.7)        | 52.7<br>(13.5)       | 49.6<br>(15.0)       | 0.52        |
| Low density lipoprotein<br>cholesterol (mg/dl), mean (SD)  | 109.7<br>(28.9) | 112.8<br>(28.7)      | 109.7<br>(29.0)       | 108.1<br>(28.3)      | 108.2<br>(30.2)      | 0.80        |
| Known diabetes mellitus, %                                 | 7.8             | 2.9                  | 8.5                   | 8.6                  | 11.4                 | 0.29        |
| Known hypertension, %                                      | 27.8            | 22.9                 | 31.0                  | 27.1                 | 30.0                 | 0.71        |
| Glucose level (mg/dl), mean<br>(SD)                        | 99.8<br>(41.9)  | 92.8<br>(11.6)       | 96.7<br>(36.9)        | 105.8<br>(56.9)      | 104.0<br>(48.1)      | 0.27        |
| Clinic SBP (mm Hg), mean<br>(SD)                           | 116.1<br>(16.6) | 114.0<br>(13.7)      | 114.8<br>(13.3)       | 118.0<br>(21.3)      | 117.6<br>(16.9)      | 0.45        |
| Clinic DBP (mm Hg), mean<br>(SD)                           | 73.8<br>(11.4)  | 71.4<br>(10.8)       | 74.7<br>(10.2)        | 75.0<br>(14.0)       | 74.2<br>(9.9)        | 0.29        |
| Clinic pulse pressure (mm Hg),<br>mean (SD)                | 42.3<br>(10.5)  | 42.6<br>(8.9)        | 40.1<br>(9.3)         | 43.2<br>(10.4)       | 43.4<br>(13.1)       | 0.28        |

\*If CAC measurement not available, Year 20 data were used

Quartiles of mean nocturnal systolic BP/mean daytime systolic BP ratio: **Q1:** 0.7197-0.8454 (n=70); **Q2:** 0.8455-0.8809 (n=71); **Q3:** 0.8810-0.9203 (n=70); **Q4:** 0.9204-1.2358 (n=70)

**Table S3. Association of Blood Pressure Dipping Quartile with Future Coronary Artery Calcification (CAC), Stratified by Baseline Smoking Status**

**Non-Smokers**

|                                                                                | <b>% with CAC</b> | <b>OR</b>  | <b>95% confidence interval</b> | <b>p-value</b> | <b>Test for nonlinearity p-value</b> |
|--------------------------------------------------------------------------------|-------------------|------------|--------------------------------|----------------|--------------------------------------|
| <b>Crude (n/N)*</b>                                                            |                   |            |                                |                | 0.006                                |
| Q1 (10/43)                                                                     | 23.3              | 3.49       | 1.01-12.1                      | 0.049          |                                      |
| Q2 (6/49)                                                                      | 12.2              | 1.61       | 0.42-6.08                      | 0.49           |                                      |
| Q3 (4/50)                                                                      | 8.0               | 1.00 (ref) |                                |                |                                      |
| Q4 (6/35)                                                                      | 17.1              | 2.38       | 0.62-9.16                      | 0.21           |                                      |
| <b>Adjusted for age, sex, race, BMI, and HDL-C</b>                             |                   |            |                                |                | 0.13                                 |
| Q1                                                                             |                   | 3.68       | 0.92-14.6                      | 0.065          |                                      |
| Q2                                                                             |                   | 1.66       | 0.38-7.27                      | 0.50           |                                      |
| Q3                                                                             |                   | 1.00 (ref) |                                |                |                                      |
| Q4                                                                             |                   | 1.71       | 0.39-7.54                      | 0.48           |                                      |
| <b>Adjusted for Year 5 ASBP, ADBP, SDBP</b>                                    |                   |            |                                |                | 0.007                                |
| Q1                                                                             |                   | 2.19       | 0.56-8.56                      | 0.26           |                                      |
| Q2                                                                             |                   | 1.02       | 0.25-4.20                      | 0.97           |                                      |
| Q3                                                                             |                   | 1.00 (ref) |                                |                |                                      |
| Q4                                                                             |                   | 3.10       | 0.73-13.3                      | 0.13           |                                      |
| <b>Adjusted for additional year 5 covariates<sup>†</sup> and CAC exam year</b> |                   |            |                                |                | 0.12                                 |
| Q1                                                                             |                   | 1.14       | 0.17-7.84                      | 0.90           |                                      |
| Q2                                                                             |                   | 0.88       | 0.12-6.64                      | 0.90           |                                      |
| Q3                                                                             |                   | 1.00 (ref) |                                |                |                                      |
| Q4                                                                             |                   | 2.14       | 0.22-21.2                      | 0.51           |                                      |

## Smokers

|                                                                                | % with CAC | OR         | 95% confidence interval | p-value | Test for nonlinearity p-value |
|--------------------------------------------------------------------------------|------------|------------|-------------------------|---------|-------------------------------|
| <b>Crude (n/N)*</b>                                                            |            |            |                         |         | 0.18                          |
| Q1 (11/17)                                                                     | 64.7       | 6.42       | 1.00-41.2               | 0.05    |                               |
| Q2 (3/14)                                                                      | 21.4       | 0.96       | 0.13-7.23               | 0.96    |                               |
| Q3 (2/9)                                                                       | 22.2       | 1.00 (ref) |                         |         |                               |
| Q4 (12/22)                                                                     | 54.6       | 4.20       | 0.71-24.9               | 0.11    |                               |
| <b>Adjusted for age, sex, race, BMI, and HDL-C</b>                             |            |            |                         |         | 0.22                          |
| Q1                                                                             |            | 7.75       | 1.04-57.5               | 0.045   |                               |
| Q2                                                                             |            | 1.47       | 0.16-13.8               | 0.74    |                               |
| Q3                                                                             |            | 1.00 (ref) |                         |         |                               |
| Q4                                                                             |            | 5.03       | 0.72-35.3               | 0.10    |                               |
| <b>Adjusted for Year 5 ASBP, ADBP, SDBP</b>                                    |            |            |                         |         | 0.19                          |
| Q1                                                                             |            | 7.81       | 1.13-53.9               | 0.037   |                               |
| Q2                                                                             |            | 1.03       | 0.13-7.94               | 0.98    |                               |
| Q3                                                                             |            | 1.00 (ref) |                         |         |                               |
| Q4                                                                             |            | 2.78       | 0.36-21.7               | 0.33    |                               |
| <b>Adjusted for additional year 5 covariates<sup>†</sup> and CAC exam year</b> |            |            |                         |         | 0.077                         |
| Q1                                                                             |            | 24.0       | 1.26-459.6              | 0.034   |                               |
| Q2                                                                             |            | 1.32       | 0.06-27.8               | 0.86    |                               |
| Q3                                                                             |            | 1.00 (ref) |                         |         |                               |
| Q4                                                                             |            | 11.7       | 0.47-295.2              | 0.13    |                               |

OR, odds ratio; ref, referent; ASBP, awake systolic blood pressure average; ADBP, awake diastolic blood pressure average; SDBP, sleep diastolic blood pressure average; CAC, coronary artery calcium.

\* **n/N**: No. of cases/Total number of subjects with known non-zero Agatston score

† Adjusted for age, sex, race, education, BMI, ASBP, ADBP, SDBP, LDL-C, HDL-C, known diabetes, known hypertension, baseline clinic systolic BP, baseline clinic diastolic BP, alcohol intake, physical activity, family history of hypertension, family history of diabetes, poor sleep quality during ABPM.

**Table S4. Presence of Coronary Artery Calcification (CARDIA Year 20 or Year 15) by Quartile of Baseline Mean Nighttime to Daytime Systolic BP Difference (N=239)**

| Quartile                                                            | % with CAC | OR         | 95% confidence interval | p-value |
|---------------------------------------------------------------------|------------|------------|-------------------------|---------|
| <b>Crude (n/N)*</b>                                                 |            |            |                         |         |
| Q1 (18/64)                                                          | 28.1       | 4.30       | (1.48-12.5)             | 0.007   |
| Q2 (15/66)                                                          | 22.7       | 3.24       | (1.10-9.54)             | 0.03    |
| Q3 (5/60)                                                           | 8.3        | 1.00 (ref) |                         |         |
| Q4 (16/49)                                                          | 32.7       | 5.33       | (1.79-15.9)             | 0.003   |
| <b>Adjusted for additional Year 5-covariates† and CAC exam year</b> |            |            |                         |         |
| Q1                                                                  |            | 4.46       | (0.98-20.3)             | 0.053   |
| Q2                                                                  |            | 5.12       | (1.24-21.2)             | 0.024   |
| Q3                                                                  |            | 1.00 (ref) |                         |         |
| Q4                                                                  |            | 8.00       | (1.74-36.8)             | 0.008   |
| <b>Additionally-adjusted for smoking in CAC exam year</b>           |            |            |                         |         |
| Q1                                                                  |            | 4.05       | (0.90-18.4)             | 0.07    |
| Q2                                                                  |            | 4.40       | (1.06-18.2)             | 0.04    |
| Q3                                                                  |            | 1.00 (ref) |                         |         |
| Q4                                                                  |            | 6.90       | (1.51-31.4)             | 0.013   |

CAC, coronary artery calcium; OR, odds ratio; ref, referent

\* n/N: No. of cases/Total number of subjects with known non-zero Agatston score

† Adjusted for age, sex, race, education, BMI, baseline smoker, ASBP, ADBP, SDBP, serum cotinine level, LDL, HDL, known diabetes, known hypertension, baseline clinic systolic BP, baseline clinic diastolic BP, pack-years of tobacco, alcohol intake, physical



activity, family history of hypertension, family history of diabetes, poor sleep quality during ABPM, and CAC exam year.

Quartiles of mean nocturnal systolic BP minus mean daytime systolic BP ratio: **Q1:** -37 to -19 (n=75); **Q2:** -18 to -14 (n=74); **Q3:** -13 to -9 (n=71); **Q4:** -8 to 27 (n=61)
